# Supplementary material for: Synthesis of Organic Iodine Compounds in Sweetcorn under the Influence of Exogenous Foliar Application of Iodine and Vanadium
Source: MDPI journal article supplement (doi:10.3390/molecules27061822), 2022-03-11
Supplement: s1 [file s1]

**Table S1.** Content of total sugars, ascorbic acid in grain and % dry weight from Experiment No.1 at 2018 and No.2 at 2019.

| Treatment             | Experiment No. 1_2018                  |                                          |                  |
|-----------------------|----------------------------------------|------------------------------------------|------------------|
|                       | Vitamin C [mg·100g <sup>-1</sup> d.w.] | Total Sugars mg·100g <sup>-1</sup> d.w.] | % D.W            |
| Control               | 23.09 ± 1.06 ab                        | 1448.31 ± 58.78 e                        | 41.84 ± 1.38 a   |
| V1                    | 32.00 ± 0.58 def                       | 1108.07 ± 17.11 c                        | 40.51 ± 0.92 a   |
| V2                    | 21.06 ± 1.15 a                         | 1146.36 ± 73.09 c                        | 42.33 ± 1.07 a   |
| KI                    | 25.05 ± 0.39 abc                       | 1211.36 ± 48.95 cd                       | 39.46 ± 0.7 a    |
| KI+ V1                | 26.75 ± 0.79 bcd                       | 1399.23 ± 62.4 de                        | 41.02 ± 0.73 a   |
| KI +V2                | 29.86 ± 1.12 cde                       | 1439.01 ± 58.1 e                         | 40.05 ± 0.31 a   |
| KIO <sub>3</sub>      | 26.59 ± 0.76 bc                        | 1074.44 ± 31.04 bc                       | 42.65 ± 0.91 a   |
| KIO <sub>3</sub> + V1 | 30.27 ± 1.57 cde                       | 1285.62 ± 39.56 cde                      | 39.93 ± 0.58 a   |
| KIO <sub>3</sub> + V2 | 33.36 ± 1.06 ef                        | 733.72 ± 28.58 a                         | 42.65 ± 1.16 a   |
| 5ISA                  | 25.59 ± 0.62 abc                       | 817.7 ± 21.94 a                          | 42.27 ± 0.53 a   |
| 5ISA + V1             | 29.6 ± 0.79 cde                        | 793.22 ± 13.24 a                         | 41.25 ± 0.59 a   |
| 5ISA + V2             | 28.59 ± 0.66 cde                       | 1102.01 ± 41.03 c                        | 43.07 ± 0.82 a   |
| 2IBA                  | 35.74 ± 1.82 f                         | 685.48 ± 18.9 a                          | 40.44 ± 1.49 a   |
| 2IBA + V1             | 20.58 ± 0.3 a                          | 858.96 ± 23.9 a                          | 41.39 ± 0.68 a   |
| 2IBA + V2             | 42.93 ± 1.7 g                          | 879.13 ± 35.14 ab                        | 39.98 ± 1.42 a   |
| Treatment             | Experiment No. 2_2019                  |                                          |                  |
|                       | Vitamin C [mg·100g <sup>-1</sup> d.w.] | Total Sugars mg·100g <sup>-1</sup> d.w.] | % D.W            |
| Control               | 29.75 ± 0.36 a                         | 660.71 ± 27.64 bcde                      | 32.33 ± 0.19 de  |
| V1                    | 37.38 ± 0.48 bc                        | 846.41 ± 13.93 gh                        | 34.65 ± 0.18 e   |
| V2                    | 28.85 ± 1.8 a                          | 875.16 ± 19.3 h                          | 30.94 ± 0.74 cd  |
| KI                    | 39.24 ± 1.47 bc                        | 828.28 ± 37.14 fgh                       | 25.29 ± 1.06 a   |
| KI+ V1                | 39.43 ± 1.22 bc                        | 831.41 ± 18.27 fgh                       | 27.83 ± 0.44 abc |
| KI +V2                | 38.52 ± 1.63 bc                        | 705.79 ± 27.49 de                        | 31.08 ± 0.69 cde |
| KIO <sub>3</sub>      | 36.8 ± 0.56 b                          | 551.25 ± 4.72 ab                         | 30.77 ± 0.17 bcd |
| KIO <sub>3</sub> + V1 | 38.69 ± 1.58 bc                        | 601.53 ± 38.66 abcd                      | 31.33 ± 1.72 cde |
| KIO <sub>3</sub> + V2 | 50.15 ± 0.55 e                         | 695.65 ± 13.57 cde                       | 28.31 ± 0.45 abc |
| 5ISA                  | 38.97 ± 1.76 bc                        | 871.99 ± 34.3 h                          | 27.88 ± 1.01 abc |
| 5ISA + V1             | 40.6 ± 0.84 bcd                        | 755.69 ± 9.07 efg                        | 30.05 ± 0.2 bcd  |
| 5ISA + V2             | 43.13 ± 0.91 cd                        | 654.53 ± 16.26 bcde                      | 28.55 ± 0.59 abc |
| 2IBA                  | 45.69 ± 0.75 de                        | 493.00 ± 7.54 a                          | 31.47 ± 0.48 cde |
| 2IBA + V1             | 29.42 ± 1.08 a                         | 590.54 ± 10.61 abc                       | 29.00 ± 0.57 bcd |
| 2IBA + V2             | 62.96 ± 1.41 f                         | 721.66 ± 16.84 ef                        | 27.18 ± 0.51 ab  |

Means followed by different letters for treatments differ significantly at  $p < 0.05$  ( $n = 8$ ). Bars indicate standard error.

**Table S2.** Content of total sugars, ascorbic acid in grain from and % dry weight Experiment No.3 at 2019/2020.

| Treatment | Vitamin C mg·100g <sup>-1</sup> d.w. | Total sugars mg·100g <sup>-1</sup> d.w. | % D.W            |
|-----------|--------------------------------------|-----------------------------------------|------------------|
| Control   | 30.48 ± 3.75 bc                      | 1862.48 ± 520.01 abc                    | 30.69 ± 1.12 c   |
| V1        | 29.91 ± 2.84 bc                      | 2432.59 ± 711.32 e                      | 28.13 ± 1.27 abc |
| KI        | 43.38 ± 4.62 d                       | 2300.26 ± 576.33 de                     | 25.51 ± 0.62 a   |
| KI+ V1    | 33.48 ± 5.95 c                       | 1713.01 ± 391.84 a                      | 30.82 ± 1.06 c   |

|                       |                 |                      |                 |
|-----------------------|-----------------|----------------------|-----------------|
| KIO <sub>3</sub>      | 48.61 ± 2.63 e  | 2157.15 ± 481.01 cde | 26.89 ± 0.57 ab |
| KIO <sub>3</sub> + V1 | 27.75 ± 2.06 ab | 2288.56 ± 629.38 de  | 28.99 ± 1.9 bc  |
| 5ISA                  | 30.66 ± 1.13 bc | 2288.2 ± 567.6 de    | 26.71 ± 0.7 ab  |
| 5ISA + V1             | 23.96 ± 1.12 a  | 1762.33 ± 404.77 ab  | 29.54 ± 1.33 bc |
| 2IBA                  | 28.49 ± 0.87 ab | 1881.89 ± 393.65 abc | 28.83 ± 0.75 bc |
| 2IBeA + V1            | 29.45 ± 1.62 bc | 2043.73 ± 521.47 bcd | 30.26 ± 1.62 c  |

Means followed by different letters for treatments differ significantly at  $p < 0.05$  ( $n = 8$ ). Bars indicate standard error.
